# Supplementary material for: Maternal transmission of an Igf2r domain 11: IGF2 binding mutant allele (Igf2rI1565A) results in partial lethality, overgrowth and intestinal adenoma progression
Source: PubMed Central journal article supplement (PMC6684648; doi:10.1038/s41598-019-47827-9), 2019-08-06
Supplement: 41598_2019_47827_MOESM1_ESM.pdf [file 41598_2019_47827_MOESM1_ESM.pdf]

## Supplementary Information

**Maternal transmission of an *Igf2r* domain 11: IGF2 binding mutant (*Igf2r*<sup>11565A</sup>) results in partial lethality, overgrowth and intestinal adenoma progression.**

Jennifer Hughes<sup>1\*</sup>, Mirvat Surakhy<sup>1\*</sup>, Sermet Can<sup>1\*</sup>, Martin Ducker<sup>2</sup>, Nick Davies<sup>2</sup>, Francis Szele<sup>2</sup>, Claudia Buehnemann<sup>1</sup>, Emma Carter<sup>1</sup>, Roman Trikin<sup>1</sup>, Matthew P. Crump<sup>3</sup>, Susana Frago<sup>1</sup> and A. Bassim Hassan<sup>1¶</sup>

## Supplementary Table S1

### Summary of homozygote breeding ( $Igf2r^{+m/1565A}$ ♀ x $Igf2r^{+m/1565A}$ ♂) outcomes in utero

| Stage       | Genotypes             | Observed | Expected |      |
|-------------|-----------------------|----------|----------|------|
| E14.5       | $Igf2r^{+m/+p}$       | 4        | 2.25     | P=NS |
|             | $Igf2r^{+m/1565A}$ or | 3        | 4.5      |      |
|             | $Igf2r^{1565A/+p}$    |          |          |      |
|             | $Igf2r^{1565A/1565A}$ | 2        | 2.25     |      |
| E17.5       | $Igf2r^{+m/+p}$       | 4        | 5.75     | P=NS |
|             | $Igf2r^{+m/1565A}$ or | 7        | 9.5      |      |
|             | $Igf2r^{1565A/+p}$    |          |          |      |
|             | $Igf2r^{1565A/1565A}$ | 8        | 4.75     |      |
| E18.5       | $Igf2r^{+m/+p}$       | 4        | 3.75     | P=NS |
|             | $Igf2r^{+m/1565A}$ or | 6        | 7.5      |      |
|             | $Igf2r^{1565A/+p}$    |          |          |      |
|             | $Igf2r^{1565A/1565A}$ | 5        | 3.75     |      |
| All Embryos | $Igf2r^{+m/+p}$       | 12       | 10.75    | P=NS |
|             | $Igf2r^{+m/1565A}$ or | 16       | 21.5     |      |
|             | $Igf2r^{1565A/+p}$    |          |          |      |
|             | $Igf2r^{1565A/1565A}$ | 15       | 10.75    |      |

$X^2$  and one-way ANOVA, Kruskal-Wallis, with Dunns multiple comparison post-test.

## Supplementary Figure S1

### Southern Blot Analysis Homologous recombination at the 5' side

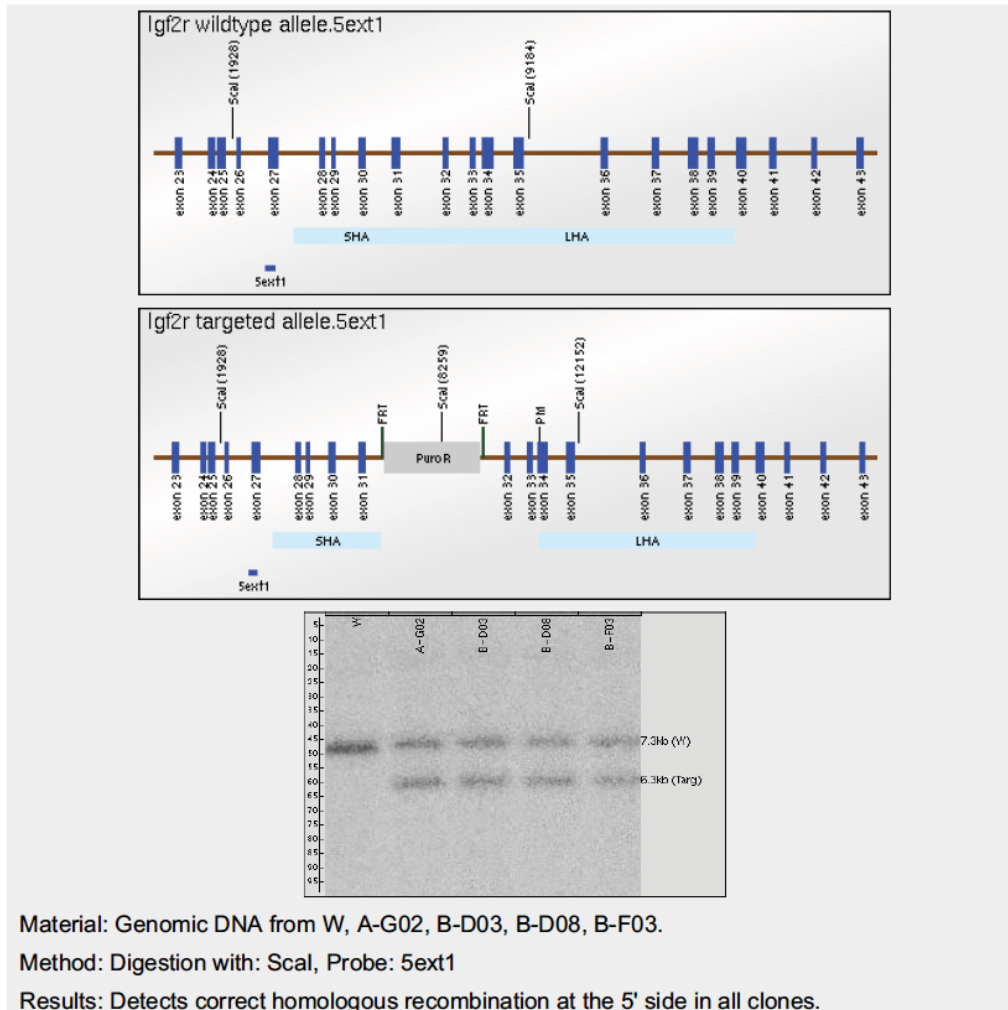

Locus and southern blot of 5'probe 5ext1 shown in Figure 2b.

## Supplementary Figure S2

### Homologous recombination at the 3' side

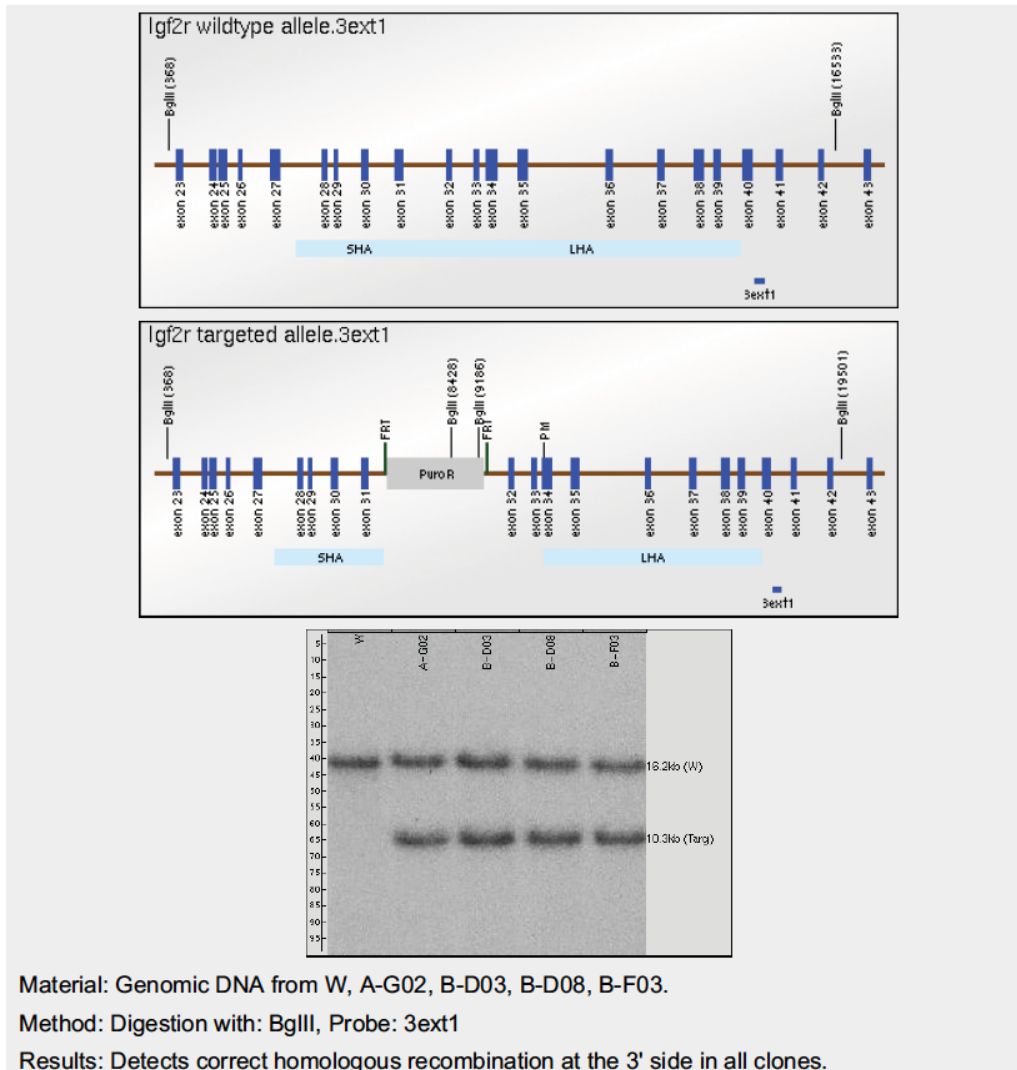

Locus and southern blot of 3'probe 3ext1 in Figure 2b.

## Supplementary Figure S3

### Homologous recombination at the 5' side and single integration

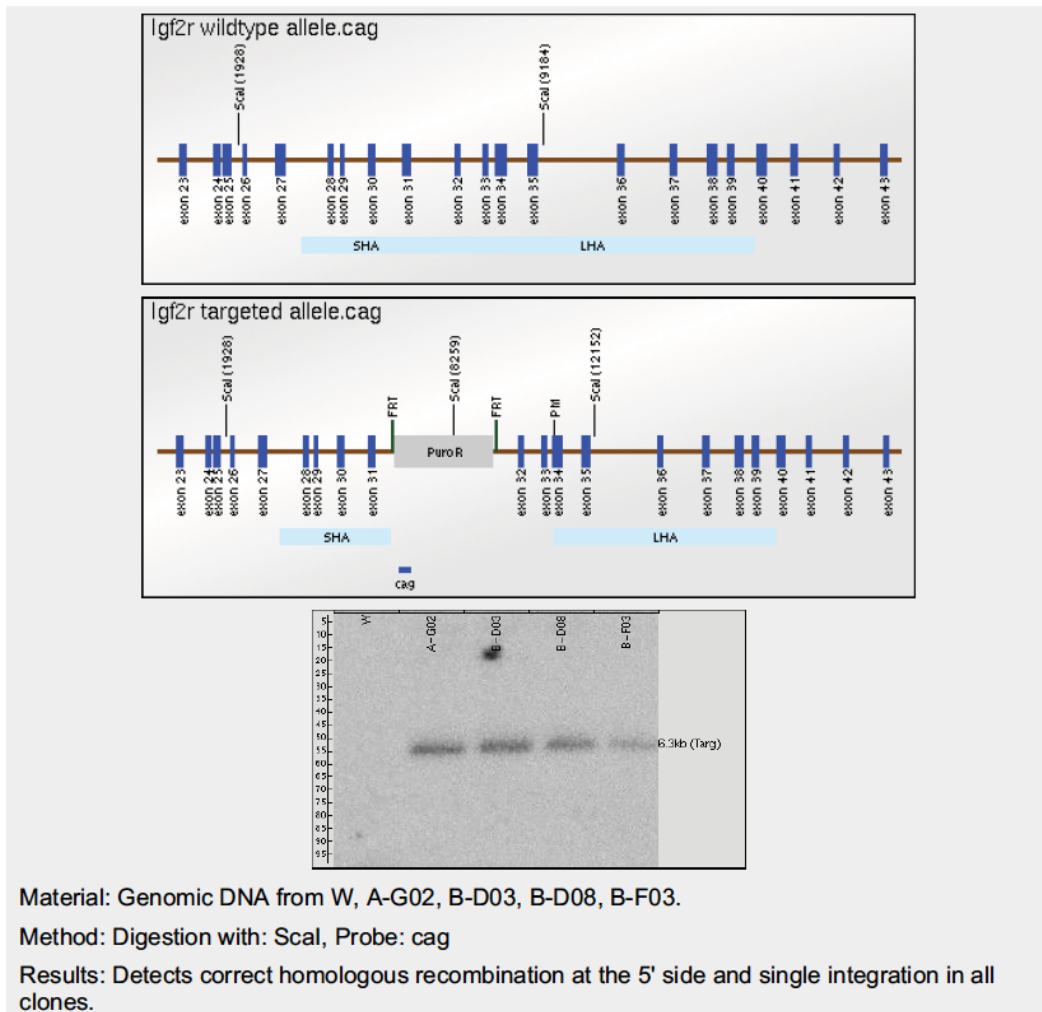

Southern blot of probe cag in Figure 2b.

## Supplementary Figure S4

### PCR Analysis

#### PCR Analysis According to PCR SOP 5558

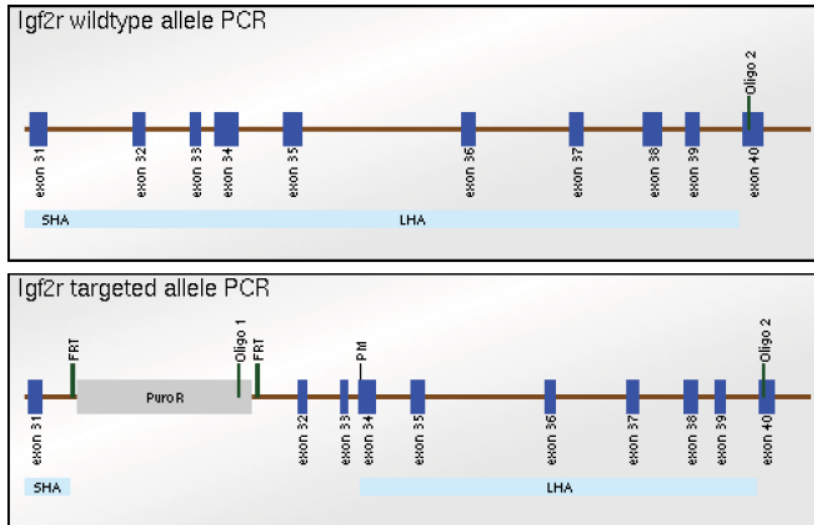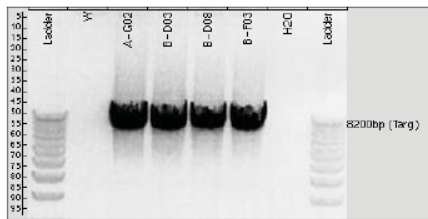

#### Igf2r PCR

The insertion of the point mutation (11565A) was detected in all targeted clones by sequencing the PCR products.

oligo1=5558\_1\_Puro\_F2  
oligo2=5558\_2\_Igf2r\_28

PCR genotyping for Figure 2c.

## Supplementary Figure S5

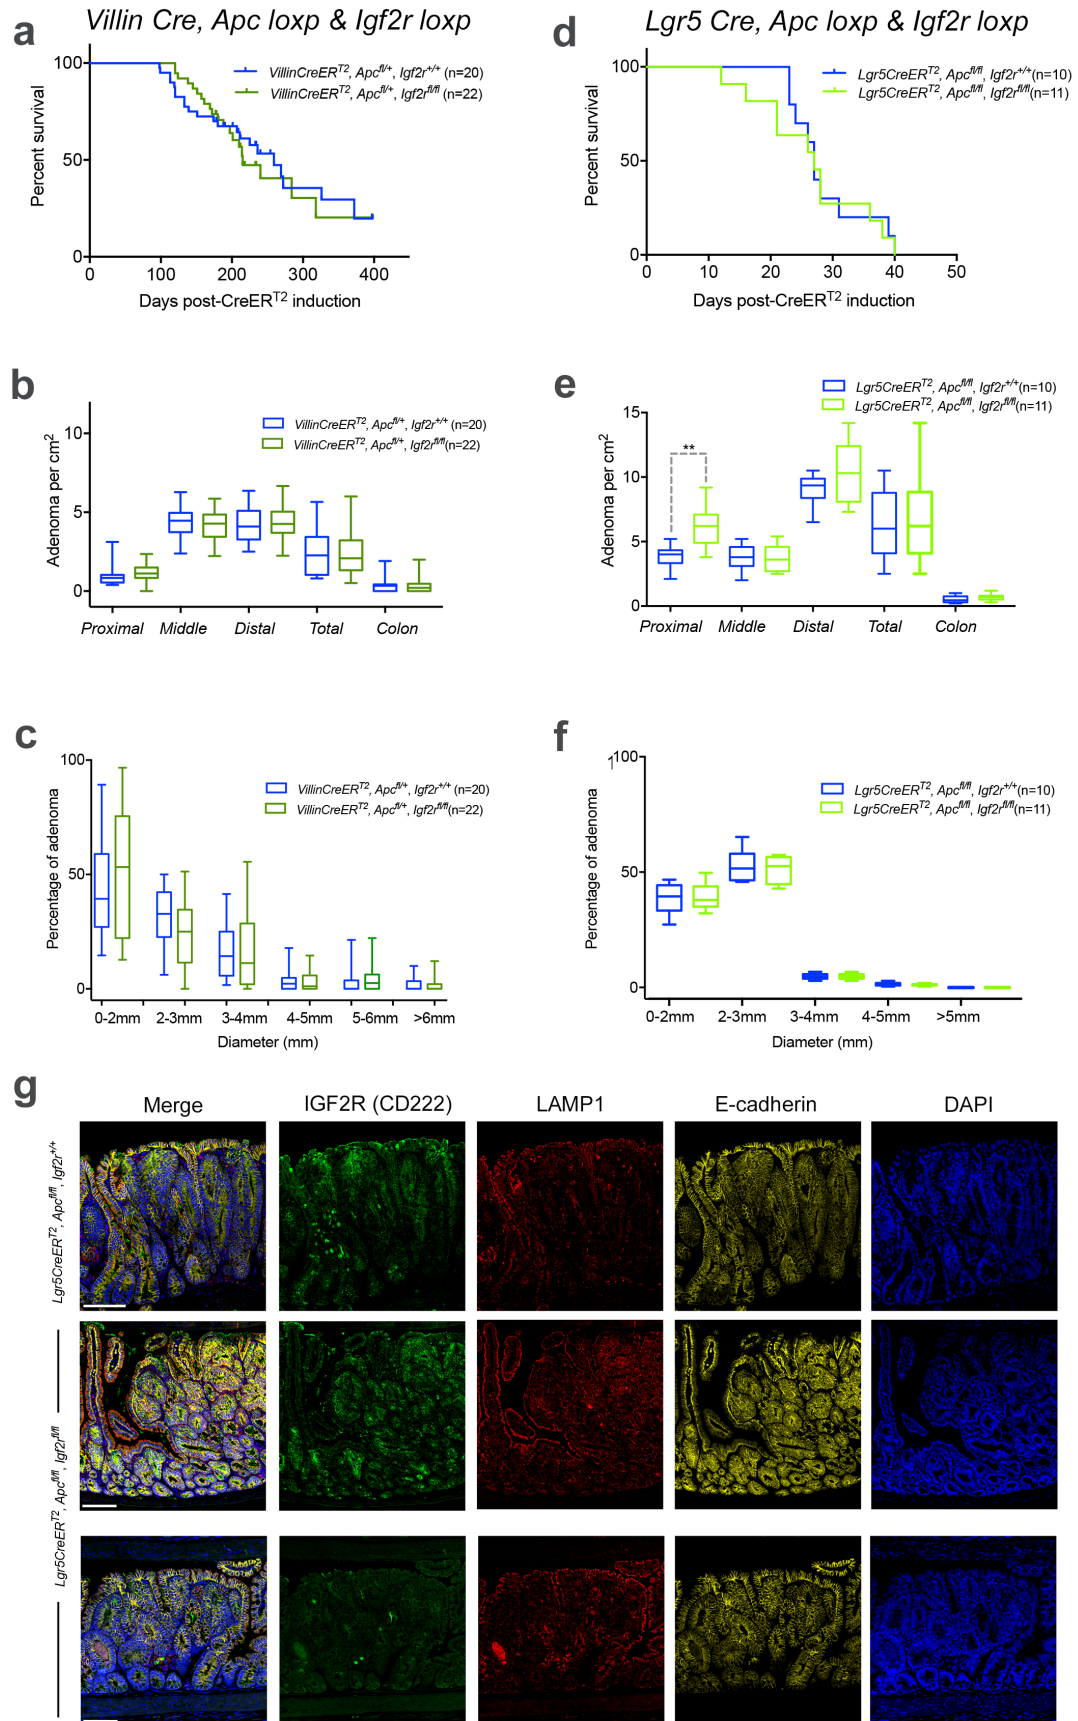

**Loss of function of *Igf2r* (*Igf2r*<sup>loxp/loxp</sup>) has limited impact on *Apc*<sup>loxp/loxp</sup> intestinal adenoma because of inefficient floxing.**

**(a, b, c)** The effects of conditional loss of function of *Igf2r* (*Igf2r*<sup>loxp/loxp</sup>) combined with heterozygote *Apc*<sup>+/loxp</sup> using tamoxifen (injection at 6-8 weeks of age) inducible villin-Cre (*Vil-CreER*<sup>T2</sup>). Note the non-significant differences in survival (Kaplan-Meier) up to 400 days in **a.**, intestinal adenoma number in the small intestine (proximal, middle and distal thirds) and colon in **b.**, and adenoma diameter in **c.**, between floxed *Apc* heterozygote without (control) and with homozygote floxed *Igf2r*. **(d, e, f)** The effects of conditional loss of function of *Igf2r* (*Igf2r*<sup>loxp/loxp</sup>) combined with homozygote *Apc*<sup>loxp/loxp</sup> using tamoxifen (injection at 6-8 weeks of age) inducible Lgr5-Cre (*Lgr5CreER*<sup>T2</sup>). Note the non-significant differences in survival up to 40 days (Kaplan-Meier) in **d.**, intestinal adenoma number in the small intestine (proximal significant unlike, middle and distal thirds) and colon in **e.**, and adenoma diameter in **f.**, between floxed homozygote *Apc* without (control) and with homozygote floxed *Igf2r*. **g.** Immuno-localisation of IGF2R compared to nuclei (DAPI), LAMP1 (endosomal compartment), E-cadherin (adherence junctions) in adenoma from *Lgr5CreER*<sup>T2</sup>, *Apc*<sup>loxp/loxp</sup>, *Igf2r*<sup>loxp/loxp</sup> in **d.** and *Igf2r*<sup>+/+</sup> control mice. Note the variable (mosaic) conditional loss of IGF2R labelling following adenoma formation. Bar 100µm.



## Supplementary Figure S6

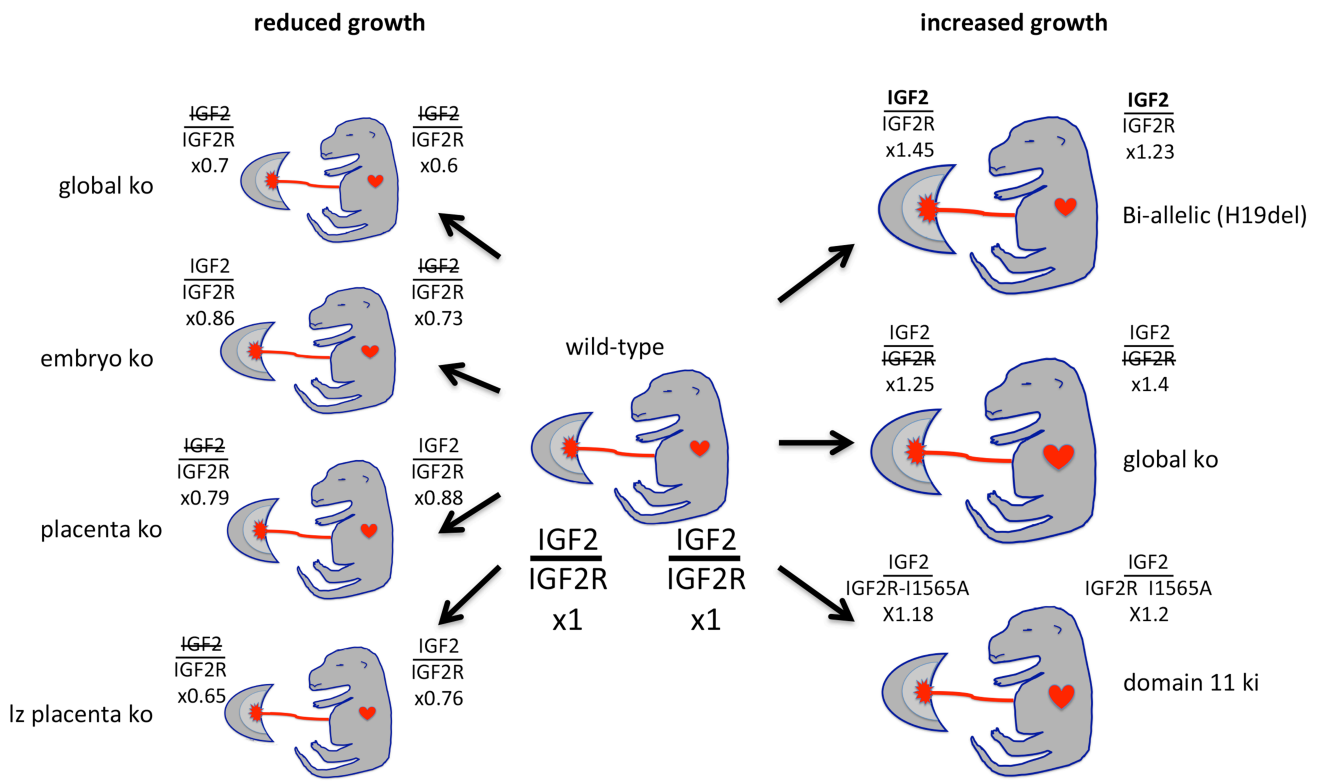

### Summary: the effects of *Igf2* and *Igf2r* genetic manipulation on the growth of embryo and placental in the mouse at E18.5.

Representation of placental and embryo growth in the mouse expressed as the ratio of growth promotion (*Igf2*) over growth inhibition (*Igf2r*) genes relative to wild-type (=1). Values obtained from the literature as summarised by <sup>1</sup> including references therein, and reported for data at E18.5. Reduced growth secondary to less IGF2 can occur following a global, embryo specific, placental specific or labyrinth zone (Lz) *Igf2* knockout (P0 promoter) of the *Igf2* gene, affecting both embryo and placenta, and resulting in disproportionate reduced growth. For overgrowth, bi-allelic expression of *Igf2* (bold) has proportionate effects on the placenta and embryo, yet global loss of function of *Igf2r* results in disproportionate overgrowth. *Igf2r*<sup>+m/1565A</sup> results in an attenuated over-growth phenotype compared to the global knockout. As the latter is a 'pure IGF2' supply effect, other functions of the receptor and/or consequences of the genetic disruption may have complicated all the other genetic models that also involve co-disruption of miRNAs and the genomic locus.

Sferruzzi-Perri, A. N., Sandovici, I., Constancia, M. & Fowden, A. L. Placental phenotype and the insulin-like growth factors: resource allocation to fetal growth. *J Physiol* **595**, 5057-5093, (2017).
